# Supplementary material for: Trajectories of Oral Anticoagulation Adherence Among Medicare Beneficiaries Newly Diagnosed With Atrial Fibrillation
Source: PubMed Central journal article supplement — J Am Heart Assoc. 2019 Jun 13;8(12):e011427. doi: 10.1161/JAHA.118.011427 (PMC6645643; doi:10.1161/jaha.118.011427), 2019-06-13
Supplement: JAH3-8-e011427-s001.pdf [file JAH3-8-e011427-s001.pdf]

# **Supplemental Material**

## **Data S1.**

### **Supplemental Methods**

#### **Definition of Covariates**

To calculate the CHA<sub>2</sub>DS<sub>2</sub>-VASc score, female sex, age between 65 and 74, congestive heart failure, hypertension history, vascular disease history and diabetes mellitus are assigned one point, and age of 75 or older and a history of previous stroke, transient ischemic attack or thromboembolism are assigned two points.<sup>1</sup> Congestive heart failure, hypertension, diabetes, and a history of stroke or transient ischemic attack were defined using the CMS Chronic Condition Warehouse definitions.<sup>2</sup> Vascular disease was defined using the CMS Chronic Condition Warehouse definition of acute myocardial infarction, and the diagnosis codes listed in Table S1 for peripheral vascular disease.

In calculating the HAS-BLED score, age of 65 or greater, labile INR, renal disease, liver disease, use of antiplatelet agents or of nonsteroidal anti-inflammatory drugs (NSAIDs), and a history of hypertension, of stroke, of major bleeding and of alcohol or drug use disorder are all assigned one point. Because claims data does not contain information on INR, the HAS-BLED score was calculated as the sum of all previous factors except labile INR.<sup>3</sup> Renal disease, hypertension, and a history of stroke were defined using the CMS Chronic Condition Warehouse definitions.<sup>2</sup> Liver disease and alcohol or drug use disorder were defined using the diagnosis codes listed in Table S1.

A history of recent bleeding was defined as having a claim with ICD-9 or ICD-10 codes for bleeding events in the year before index date (list of codes for bleeding events in Table S1).<sup>4-10</sup>

Recent antiplatelet use was defined as filling a prescription for aspirin, clopidogrel, prasugrel, dipyridamol, ticlopidine or ticagrelor in the six months before index date.<sup>4-10</sup>

Recent NSAID use was defined as filling a prescription for diclofenac, ibuprofen, naproxen, ketoprofen, fenoprofen, flurbiprofen, piroxicam, meloxicam, mefenamic acid or indomethacin in the six months before index date.<sup>4-10</sup>

**Table S1. Diagnosis Codes Used in the Definition of Covariates.**

| Covariate                          | ICD-9 Codes                                                                                                                                                                                                                                                                       | ICD-10 Codes                                                                                                                                                                                                                                                                                                                                                                        |
|------------------------------------|-----------------------------------------------------------------------------------------------------------------------------------------------------------------------------------------------------------------------------------------------------------------------------------|-------------------------------------------------------------------------------------------------------------------------------------------------------------------------------------------------------------------------------------------------------------------------------------------------------------------------------------------------------------------------------------|
| Valvular Disease                   | 394.0, V43.3                                                                                                                                                                                                                                                                      | I05.0, Z95.2                                                                                                                                                                                                                                                                                                                                                                        |
| Peripheral Vascular Disease        | 440.0x, 440.2x, 440.9x, 441.3x,<br>441.4x, 441.5x, 441.9x, 443.9x,<br>444.22, 444.81, 447.1x, 443.81,<br>250.70, 433.10, 433.11, 433.30                                                                                                                                           | I70.0, I70.2, I70.9, I71.3, I71.4,<br>I71.8, I71.9, I73.9, I74.3, I74.5,<br>I77.1, I79.8, E11.51, I65.2, I63.03,<br>I63.13, I63.23, I65.8                                                                                                                                                                                                                                           |
| Liver Disease                      | 571.xx                                                                                                                                                                                                                                                                            | K70, K71, K72, K73, K74, K75,<br>K76                                                                                                                                                                                                                                                                                                                                                |
| Alcohol or Drug Use Disorder       | 303.xx, 304.xx, 305.xx                                                                                                                                                                                                                                                            | F10, F11, F12, F13, F14, F15, F16,<br>F17, F18, F19                                                                                                                                                                                                                                                                                                                                 |
| Bleeding events                    |                                                                                                                                                                                                                                                                                   |                                                                                                                                                                                                                                                                                                                                                                                     |
| Intracranial Bleeding              | 430, 431, 432                                                                                                                                                                                                                                                                     | I60, I61, I62                                                                                                                                                                                                                                                                                                                                                                       |
| Hemoperitoneum                     | 568.81                                                                                                                                                                                                                                                                            | K66.1                                                                                                                                                                                                                                                                                                                                                                               |
| Hematuria                          | 599.7                                                                                                                                                                                                                                                                             | R31                                                                                                                                                                                                                                                                                                                                                                                 |
| Gastrointestinal Hemorrhage        | 530.7, 531.0, 531.2, 531.4,<br>531.6, 532.0, 532.2, 532.4,<br>532.6, 533.0, 533.2, 533.4,<br>533.6, 534.0, 534.2, 534.4,<br>534.6, 569.3, 535.01, 535.11,<br>535.21, 535.31, 535.41, 535.51,<br>535.61, 535.71, 537.83, 537.84,<br>562.02, 562.03, 562.12, 562.13,<br>569.85, 578 | K22.6, K25.0, K25.2, K25.4,<br>K25.6, K26.0, K26.2, K26.4,<br>K26.6, K27.0, K27.2, K27.4,<br>K27.6, K28.0, K28.2, K28.4,<br>K28.6, K62.5, K29.01, K29.21,<br>K29.31, K29.41, K29.51, K29.61,<br>K29.71, K29.81, K29.91, K31.811,<br>K31.82, K57.01, K57.11, K57.13,<br>K57.21, K57.31, K57.33, K57.41,<br>K57.51, K57.53, K57.81, K57.91,<br>K57.93, K55.21, K92.0, K92.1,<br>K92.2 |
| Epistaxis                          | 784.7                                                                                                                                                                                                                                                                             | R04.0                                                                                                                                                                                                                                                                                                                                                                               |
| Hemoptysis                         | 786.3                                                                                                                                                                                                                                                                             | R04.2                                                                                                                                                                                                                                                                                                                                                                               |
| Vaginal Hemorrhage                 | 626.2                                                                                                                                                                                                                                                                             | N92.0                                                                                                                                                                                                                                                                                                                                                                               |
| Hemarthrosis                       | 719.1                                                                                                                                                                                                                                                                             | M25.0, M12.2                                                                                                                                                                                                                                                                                                                                                                        |
| Conjunctival Hemorrhage            | 372.72                                                                                                                                                                                                                                                                            | H11.33                                                                                                                                                                                                                                                                                                                                                                              |
| Not Otherwise Specified Hemorrhage | 459                                                                                                                                                                                                                                                                               | R58                                                                                                                                                                                                                                                                                                                                                                                 |

ICD-9=International Classification of Diseases, Ninth Revision Codes; ICD-10=International Classification of Diseases, Tenth Revision Codes.

**Table S2. Comparison of Selected Baseline Characteristics between the Study Participants and Beneficiaries Excluded from the Study Because of Death within 12 months of Atrial Fibrillation Diagnosis.**

| Variable-n(%)            | Included in the Sample<br>(n=24,898) | Excluded Due to<br>Death (n=9,116) | P-value |
|--------------------------|--------------------------------------|------------------------------------|---------|
| Age                      |                                      |                                    | <0.001  |
| <65                      | 2821 (8.1)                           | 629 (6.9)                          |         |
| 65-74                    | 13817 (39.6)                         | 1978 (21.7)                        |         |
| >=75                     | 18260 (52.3)                         | 6509 (71.4)                        |         |
| Female sex               | 19376 (55.5)                         | 5494 (60.3)                        | <0.001  |
| Race                     |                                      |                                    | <0.001  |
| White                    | 30460 (87.3)                         | 7730 (84.8)                        |         |
| Black                    | 2472 (7.1)                           | 919 (10.1)                         |         |
| Hispanic                 | 523 (1.5)                            | 152 (1.7)                          |         |
| Other                    | 1443 (4.1)                           | 315 (3.5)                          |         |
| Eligibility for Medicaid | 8634 (24.7)                          | 3523 (38.6)                        | <0.001  |
| CHA2DS2-VASc score       |                                      |                                    | <0.001  |
| 0-2                      | 5608 (16.1)                          | 457 (5.0)                          |         |
| 3-4                      | 12999 (37.2)                         | 2316 (25.4)                        |         |
| ≥5                       | 16291 (46.7)                         | 6343 (69.6)                        |         |
| HAS-BLED score           |                                      |                                    | <0.001  |
| 0-1                      | 3675 (10.5)                          | 349 (3.8)                          |         |
| 2-3                      | 22248 (63.8)                         | 4691 (51.5)                        |         |
| ≥4                       | 8975 (25.7)                          | 4076 (44.7)                        |         |
| Stroke or TIA            | 7131 (20.4)                          | 2719 (29.8)                        | <0.001  |

TIA= Transient Ischemic Attack.

The table compares selected baseline characteristics between patients included in the study and those that were excluded because they died within 12 months of atrial fibrillation diagnosis. Excluded patients were generally older and more likely to have CHA2DS2-VASc $\geq$ 5. Consequently, our sample is over representative of healthier and younger patients.

**Table S3. Group-based Trajectory Model Diagnostics.**

|         | Average Posterior Probability | Odds of Correct Classification | Estimated Probability of Group Membership | Proportion Classified in Group |
|---------|-------------------------------|--------------------------------|-------------------------------------------|--------------------------------|
| Group 1 | 0.9953                        | 634                            | 0.4368                                    | 0.4376                         |
| Group 2 | 0.9495                        | 56                             | 0.0763                                    | 0.0756                         |
| Group 3 | 0.9706                        | 99                             | 0.0869                                    | 0.0863                         |
| Group 4 | 0.9888                        | 265                            | 0.4000                                    | 0.4005                         |

## Supplemental References:

1. Lip GY, Nieuwlaat R, Pisters R, Lane DA, Crijns HJ. Refining clinical risk stratification for predicting stroke and thromboembolism in atrial fibrillation using a novel risk factor-based approach: the euro heart survey on atrial fibrillation. *Chest* 2010;137:263-72.
2. 27 Chronic Condition Algorithm. 2018. (Accessed October 30, 2018, at <https://www.ccwdata.org/web/guest/condition-categories>.)
3. Pisters R, Lane DA, Nieuwlaat R, de Vos CB, Crijns HJ, Lip GY. A novel user-friendly score (HAS-BLED) to assess 1-year risk of major bleeding in patients with atrial fibrillation: the Euro Heart Survey. *Chest* 2010;138:1093-100.
4. Hernandez I, Baik SH, Pinera A, Zhang Y. Risk of bleeding with dabigatran in atrial fibrillation. *JAMA Intern Med* 2015;175:18-24.
5. Hernandez I, Zhang Y. Comparing Stroke and Bleeding with Rivaroxaban and Dabigatran in Atrial Fibrillation: Analysis of the US Medicare Part D Data. *Am J Cardiovasc Drug* 2017;17:37-47.
6. Hernandez I, Zhang Y, Brooks MM, Chin PK, Saba S. Anticoagulation Use and Clinical Outcomes After Major Bleeding on Dabigatran or Warfarin in Atrial Fibrillation. *Stroke* 2017;48:159-66.
7. Gray M, Saba S, Zhang Y, Hernandez I. Outcomes of Atrial Fibrillation Patients Newly Recommended for Oral Anticoagulation under the 2014 AHA/ACC/HRS Guideline. *J Am Heart Assoc*;7:e007881.
8. Hernandez I, Zhang Y, Saba S. Comparison of the Effectiveness and Safety of Apixaban, Dabigatran, Rivaroxaban and Warfarin in Newly Diagnosed Atrial Fibrillation. *Am J Cardiol* 2017;120:1813-9.
9. Hernandez I, Saba S, Zhang Y. Geographic Variation in the Use of Oral Anticoagulation in Stroke Prevention in Atrial Fibrillation. *Stroke*;48:2289-91.
10. Hernandez I, Zhang Y, Saba S. Effectiveness and Safety of Direct Oral Anticoagulants and Warfarin, Stratified by Stroke Risk in Patients With Atrial Fibrillation. *Am J Cardiol* 2018;122:69-75.
